# Supplementary material
Source: publisher figshare collection journal article supplement (https://tandf.figshare.com/articles/dataset/_/24160319)
Supplement: Supplementary file 4 [file 1]

# Supplemental 1

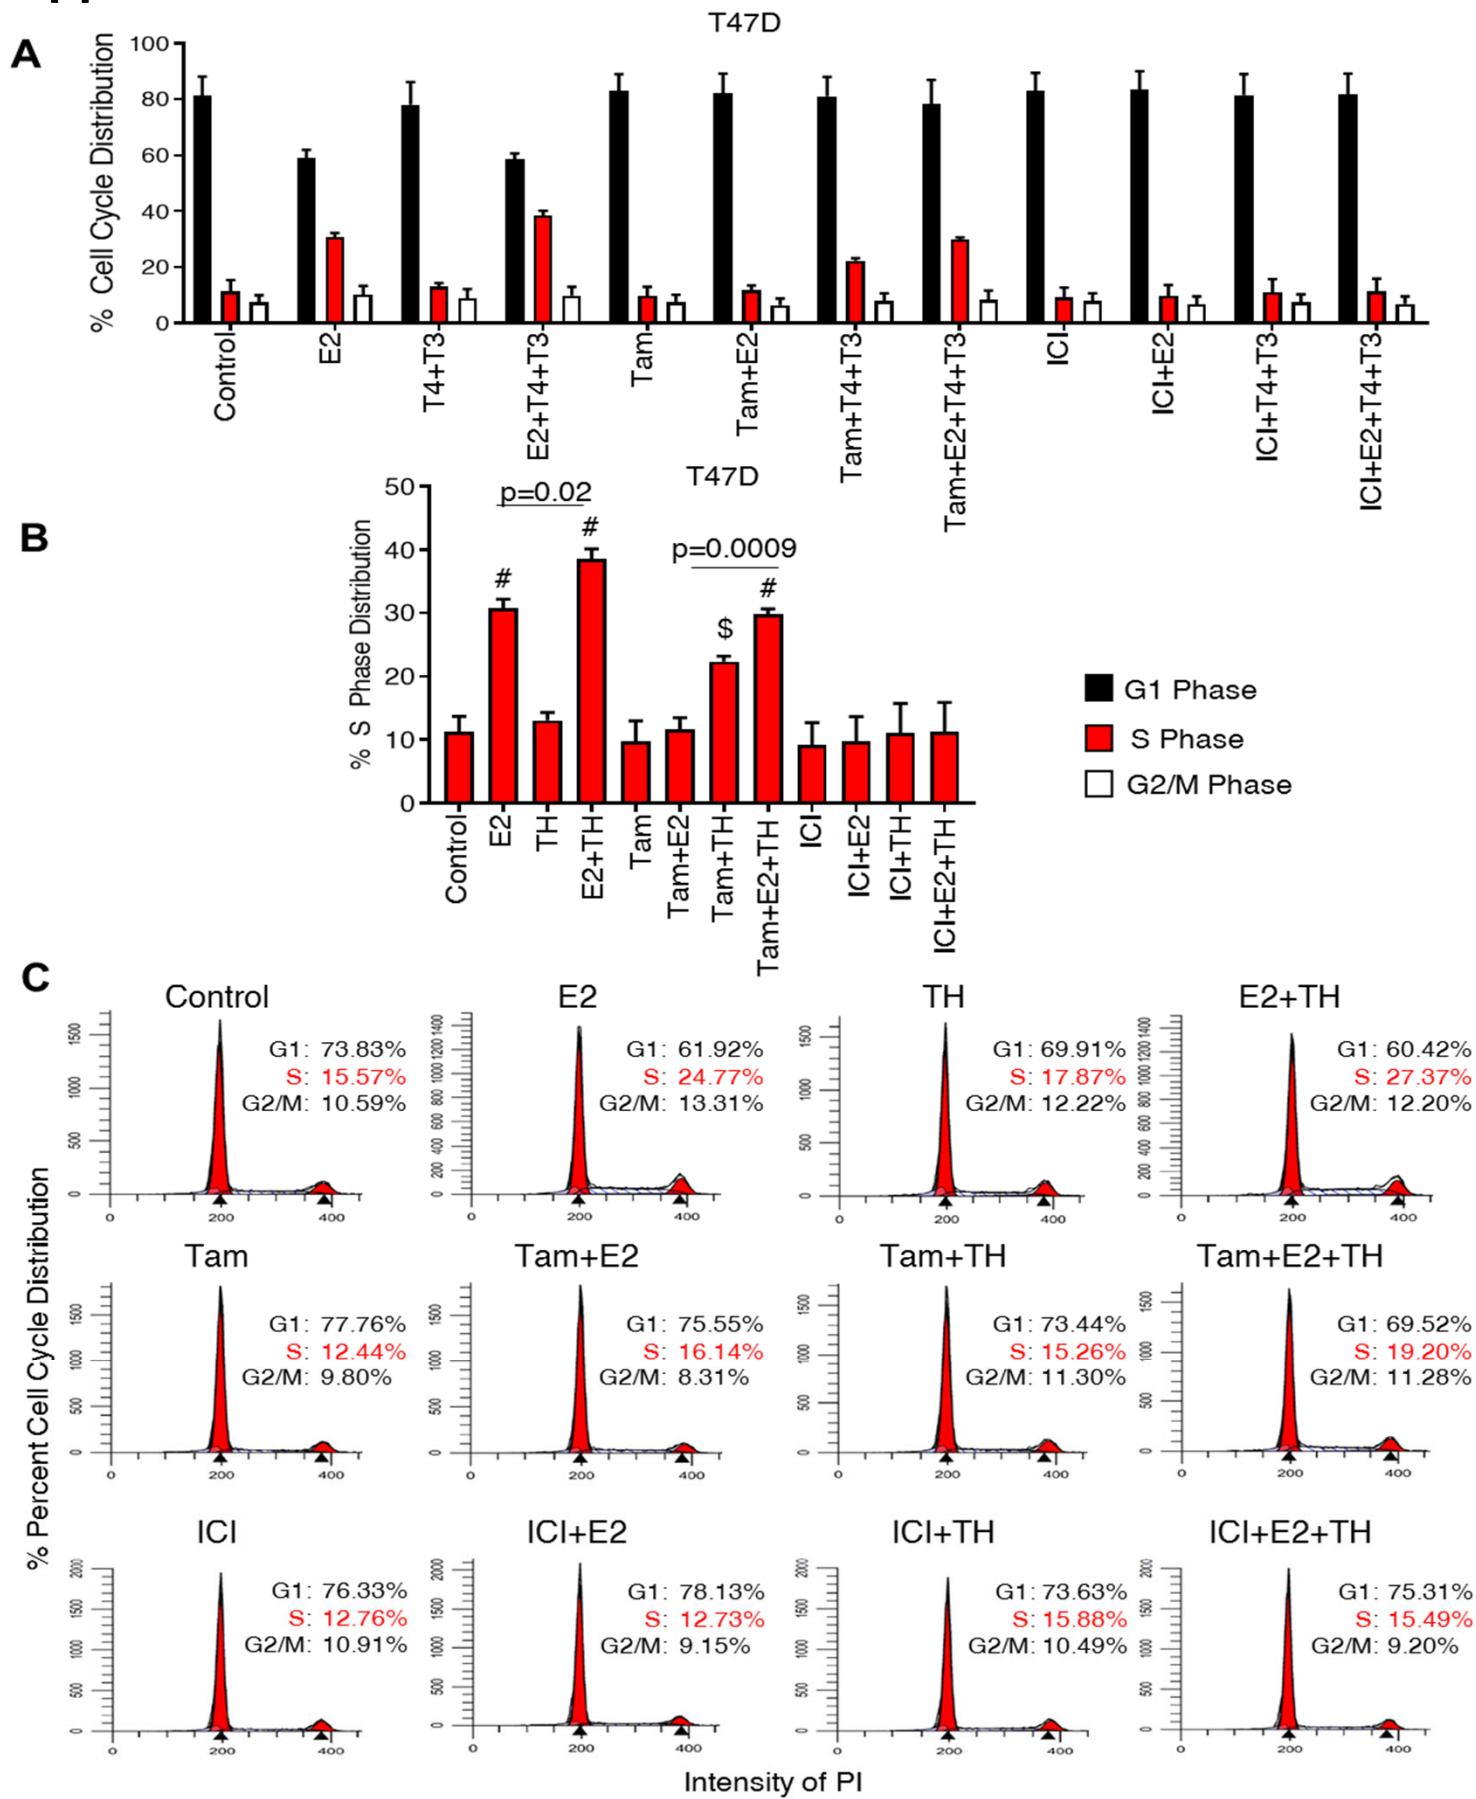

# Supplemental 2

**A** T47D

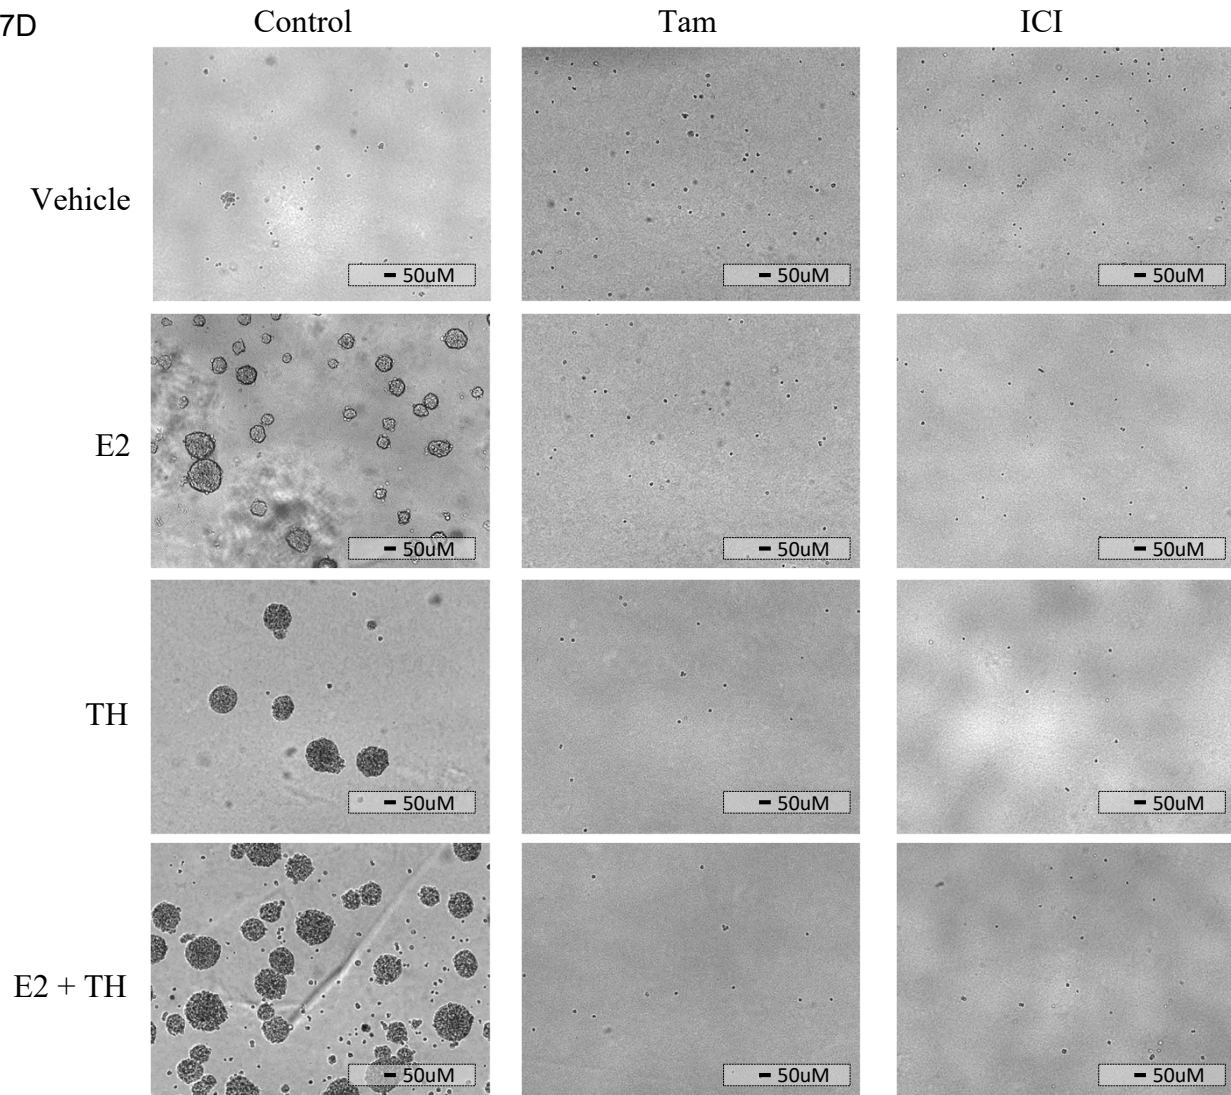

**B**

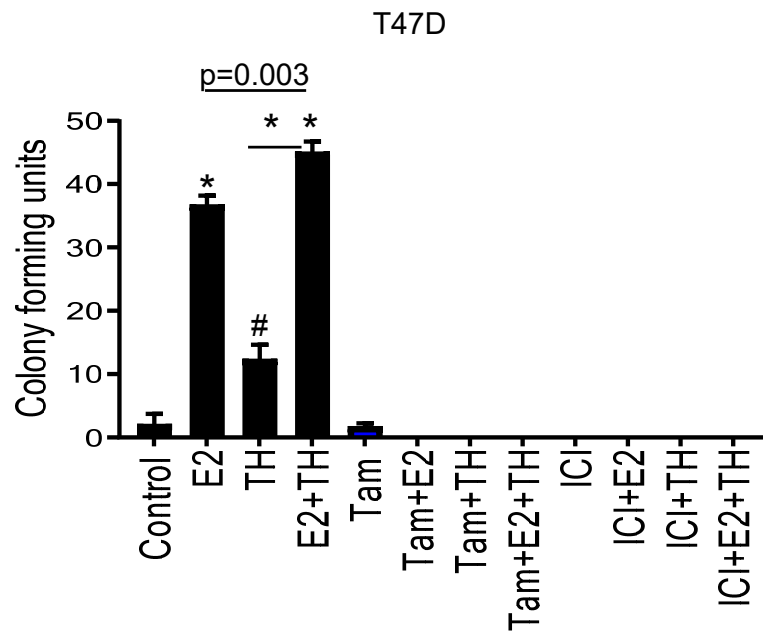

Supplemental 3

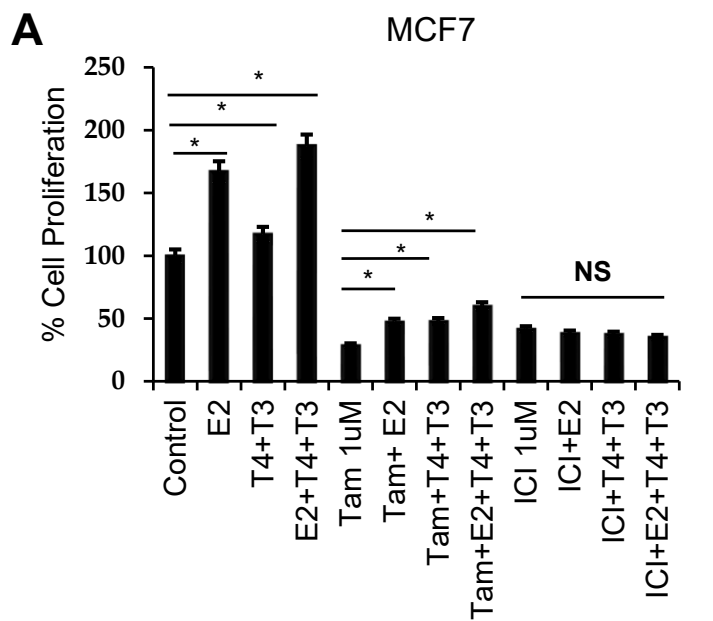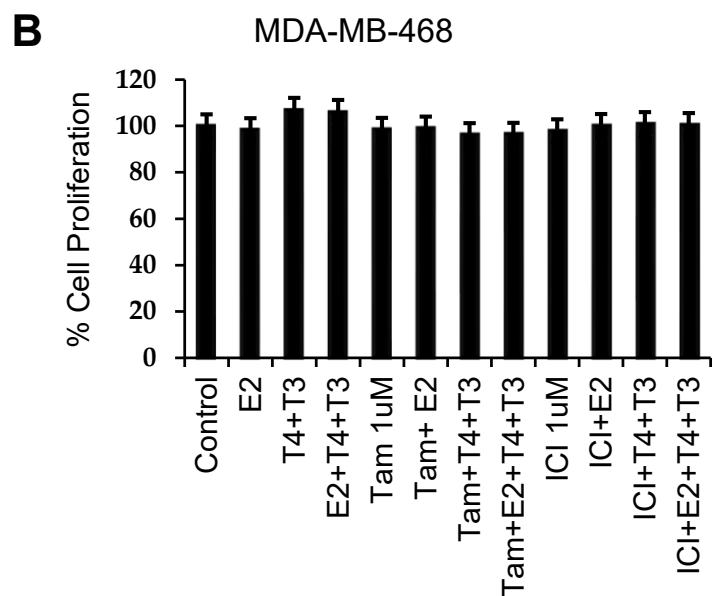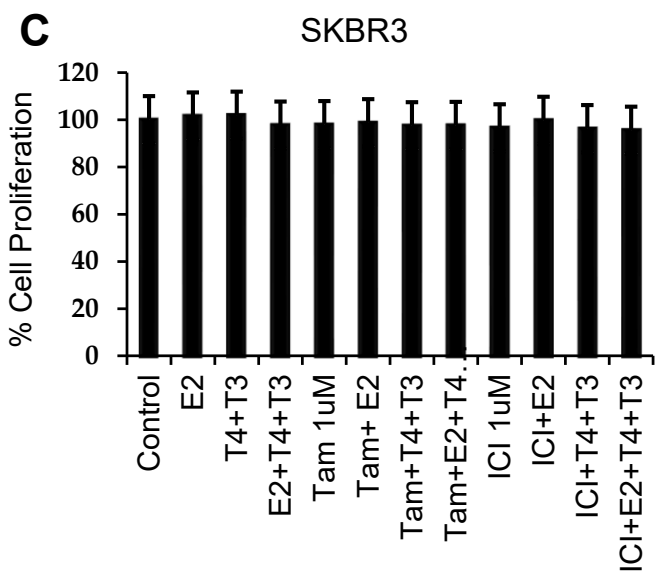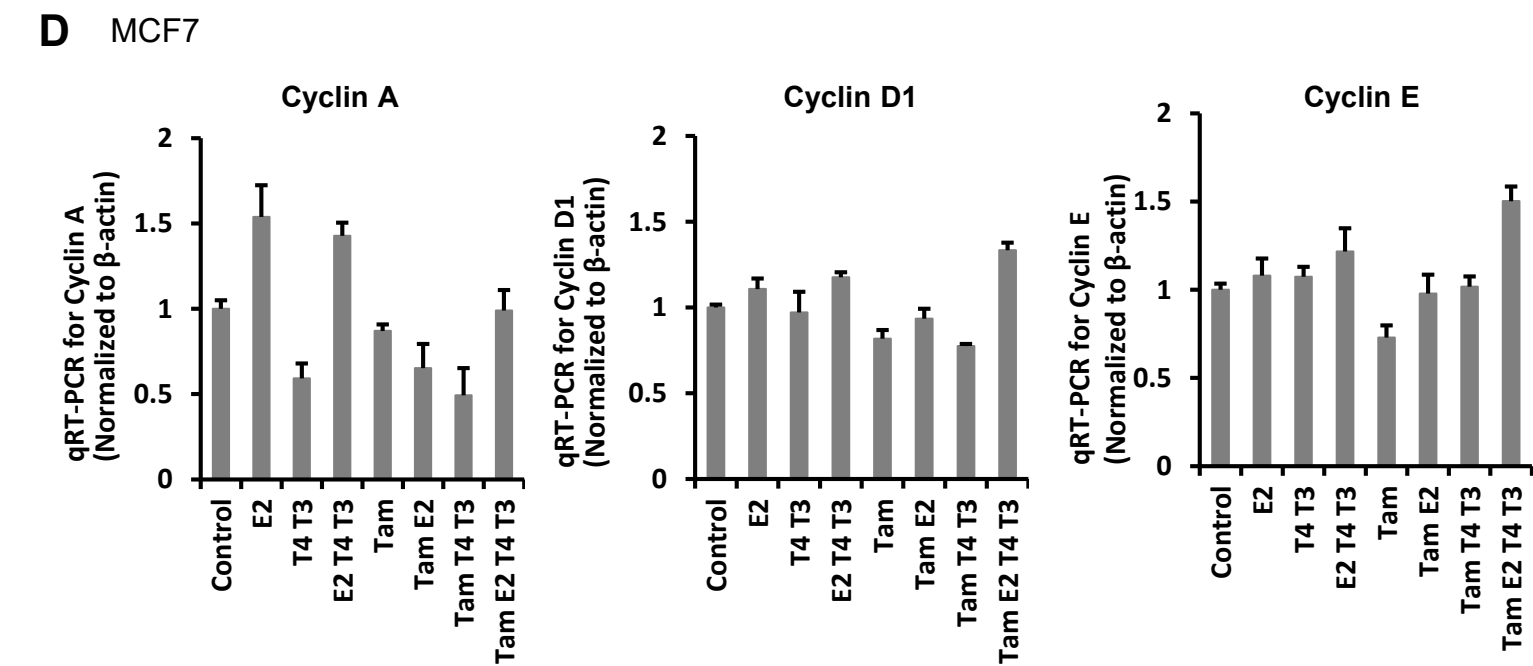

# Supplementary Table 1

| RefSeq                                           | Gene Symbol | Gene Name                                                                 | Fold Change | p-value  | Direction relative to control | Cell line |
|--------------------------------------------------|-------------|---------------------------------------------------------------------------|-------------|----------|-------------------------------|-----------|
| <b>D. Regulated by Tam relative to vehicle</b>   |             |                                                                           |             |          |                               |           |
|                                                  | HIST1H3B    | Histone cluster 1, H3B                                                    | -1.32       | 1.37E-05 | Tam Down                      | MCF7      |
|                                                  | TUBB        | Tubulin B                                                                 | -1.36       | 9.79E-07 | Tam Down                      | MCF7      |
|                                                  | TFF1        | Trefoli factor 1 (pS2)                                                    | -1.74       | 3.41E-08 | Tam Down                      | MCF7      |
|                                                  | HIST1H3B    | Histone cluster 1, H2BH                                                   | -1.79       | 9.61E-06 | Tam Down                      | MCF7      |
|                                                  | GREB1       | Growth regulation by E2 in breast cancer                                  | -1.79       | 2.54E-08 | Tam Down                      | MCF7      |
| <b>E. Regulated by Tam+E2 relative to Tam</b>    |             |                                                                           |             |          |                               |           |
|                                                  | GREB1       | Growth regulation by E2 in breast cancer                                  | 1.83        | 2.54E-08 | up vs. Tam                    | MCF7      |
|                                                  | GFRA1       | GDNF family receptor alpha1                                               | 1.73        | 4.91E-05 | up vs. Tam                    | MCF7      |
|                                                  | TFF1        | Trefoli factor 1 (pS2)                                                    | 1.68        | 3.41E-08 | up vs. Tam                    | MCF7      |
|                                                  | FKBP4       | FK506 binding protein 4                                                   | 1.5         | 5.67E-06 | up vs. Tam                    | MCF7      |
|                                                  | TUBB        | Tubulin B                                                                 | 1.35        | 9.79E-07 | up vs. Tam                    | MCF7      |
|                                                  | TH1L        | TH1-like (drosophila)                                                     | 1.33        | 2.04E-05 | up vs. Tam                    | MCF7      |
|                                                  | ACLY        | ATP citrate lyase                                                         | 1.32        | 8.96E-06 | up vs. Tam                    | MCF7      |
|                                                  | SUZ12P      | Suppressor or zeste 12 homolog pseudogene                                 | 1.2         | 4.42E-05 | up vs. Tam                    | MCF7      |
|                                                  | B4GALT1     | UDP-Gal:βGlcNAc β 1,4-galactosyltransferase, polypeptide                  | 1.83        | 2.37E-07 | up vs. Tam                    | T47D      |
|                                                  | FKBP4       | FK506 binding protein 4                                                   | 1.64        | 7.58E-09 | up vs. Tam                    | T47D      |
|                                                  | SERPINA6    | Serpin peptidase inhibitor, clade A                                       | 1.62        | 5.75E-08 | up vs. Tam                    | T47D      |
|                                                  | IGFBP4      | Insulin like growth factor binding protein 4                              | 1.51        | 4.01E-07 | up vs. Tam                    | T47D      |
|                                                  | IER3        | Immediate early response 3                                                | 1.48        | 5.67E-06 | up vs. Tam                    | T47D      |
|                                                  | TTC39A      | Tetratricopeptide repeat domain 39A                                       | 1.42        | 8.41E-06 | up vs. Tam                    | T47D      |
|                                                  | TOB1        | Transducer of ERBB2, 1                                                    | 1.39        | 2.18E-06 | up vs. Tam                    | T47D      |
|                                                  | CTSD        | Cathepsin D                                                               | 1.38        | 9.48E-07 | up vs. Tam                    | T47D      |
|                                                  | CA12        | Carbonic anhydrase XII                                                    | 1.36        | 3.64E-08 | up vs. Tam                    | T47D      |
|                                                  | BRI3BP      | BRI3 binding protein                                                      | 1.35        | 3.73E-06 | up vs. Tam                    | T47D      |
|                                                  | PXK         | PX domain containing serine/threonine kinase                              | 1.28        | 1.17E-05 | up vs. Tam                    | T47D      |
|                                                  | KRT19       | Keratin 19                                                                | 1.27        | 2.24E-05 | up vs. Tam                    | T47D      |
|                                                  | STC2        | Stanniocalcin 2                                                           | 1.25        | 2.09E-05 | up vs. Tam                    | T47D      |
| <b>F. Regulated by Tam+TH relative to Tam</b>    |             |                                                                           |             |          |                               |           |
|                                                  | STC2        | Stanniocalcin 2                                                           | 1.78        | 4.90E-11 | up vs. Tam                    | T47D      |
|                                                  | PFKFB3      | 6-phosphofructo-2-kinase/fructose-2, 6-biphosphatase 3                    | 1.44        | 3.10E-07 | up vs. Tam                    | T47D      |
|                                                  | SLC9A3R1    | Solute carrier family 9 (sodium/hydrogen exchanger), member 3 regulator 1 | 1.41        | 1.51E-07 | up vs. Tam                    | T47D      |
|                                                  | TP53INP2    | Tumor protein p53 inducible nuclear protein 2                             | 1.37        | 1.41E-05 | up vs. Tam                    | T47D      |
|                                                  | SLC7A5      | Solute carrier family 7 (cationic amino acid transporter)                 | 1.37        | 8.05E-06 | up vs. Tam                    | T47D      |
|                                                  | KPNA2       | Karyopherin α2 (RAG1 cohort 1, importin α1)                               | 1.36        | 8.49E-06 | up vs. Tam                    | T47D      |
|                                                  | C5orf13     | Chromosome 5 open reading frame 13                                        | 1.31        | 2.57E-06 | up vs. Tam                    | T47D      |
|                                                  | KRT8        | Keratin 8                                                                 | 1.28        | 9.46E-06 | up vs. Tam                    | T47D      |
| <b>G. Regulated by Tam+E2+TH relative to Tam</b> |             |                                                                           |             |          |                               |           |
|                                                  | GREB1       | Growth regulation by E2 in breast cancer                                  | 1.91        | 6.01E-06 | up vs. Tam                    | MCF7      |
|                                                  | RAD51C      | RAD51 homolog C                                                           | 1.9         | 5.91E-06 | up vs. Tam                    | MCF7      |
|                                                  | RPL7A       | Ribosomal protein L7a                                                     | 1.83        | 5.62E-05 | up vs. Tam                    | MCF7      |
|                                                  | CKS1B       | CD28 protein kinase regulatory subunit 1b                                 | 1.77        | 3.22E-05 | up vs. Tam                    | MCF7      |
|                                                  | GFRA1       | GDNF family receptor α1                                                   | 1.76        | 1.48E-05 | up vs. Tam                    | MCF7      |
|                                                  | HSP90AB1    | Heat shock protein 90kDa alpha (cytosolic)class B member 1                | 1.68        | 5.68E-05 | up vs. Tam                    | MCF7      |
|                                                  | TFF1        | Trefoil factor 1                                                          | 1.62        | 9.18E-06 | up vs. Tam                    | MCF7      |
|                                                  | HSPA8       | Heat shock 22kDa protein 8                                                | 1.52        | 4.47E-05 | up vs. Tam                    | MCF7      |
|                                                  | HIST1H2BH   | Histone cluster 1 H2bh                                                    | 1.45        | 3.02E-05 | up vs. Tam                    | MCF7      |
|                                                  | SNRPE       | Small nuclear ribonucleoprotein polypeptide E                             | 1.42        | 7.16E-05 | up vs. Tam                    | MCF7      |
|                                                  | STOML2      | Stomatin (EPB72)-like 2                                                   | 1.42        | 1.69E-05 | up vs. Tam                    | MCF7      |
|                                                  | RPSA        | Ribosomal protein SA                                                      | 1.37        | 4.38E-05 | up vs. Tam                    | MCF7      |
|                                                  | TUBB        | Tubulin, β                                                                | 1.34        | 1.37E-05 | up vs. Tam                    | MCF7      |
|                                                  | STC         | Stanniocalcin                                                             | 2.2         | 4.11E-13 | up vs. Tam                    | T47D      |
|                                                  | SEMA3C      | Sema domain, immunoglobulin domain (Ig)                                   | 2.12        | 4.63E-05 | up vs. Tam                    | T47D      |
|                                                  | B4GALT1     | UDP-Gal:βGlcNAc β 1,4-galactosyltransferase, polypeptide                  | 1.86        | 3.58E-08 | up vs. Tam                    | T47D      |
|                                                  | PGR         | progesterone receptor                                                     | 1.8         | 2.37E-06 | up vs. Tam                    | T47D      |
|                                                  | SLC9A3R1    | solute carrier family 9 member 3                                          | 1.77        | 2.97E-10 | up vs. Tam                    | T47D      |
|                                                  | SERPINA6    | Serpin peptidase inhibitor, clade A                                       | 1.71        | 6.88E-10 | up vs. Tam                    | T47D      |
|                                                  | IGFBP5      | insulin-like growth factor binding protein 5                              | 1.66        | 3.07E-07 | up vs. Tam                    | T47D      |
|                                                  | IER1        | Immediate early response 3                                                | 1.65        | 1.20E-08 | up vs. Tam                    | T47D      |
|                                                  | TTC39A      | tetratricopeptide repeat domain 39A                                       | 1.65        | 8.50E-07 | up vs. Tam                    | T47D      |
|                                                  | IGFBP4      | Insulin-like growth factor binding protein 4                              | 1.63        | 4.64E-09 | up vs. Tam                    | T47D      |
|                                                  | JAK1        | Janus kinase 1                                                            | 1.62        | 3.53E-05 | up vs. Tam                    | T47D      |
|                                                  | FKBP4       | FK506 binding protein 4                                                   | 1.6         | 9.02E-12 | up vs. Tam                    | T47D      |
|                                                  | MBOAT1      | Membrane bound O-acyltransferase domain containing 1                      | 1.57        | 3.48E-08 | up vs. Tam                    | T47D      |
|                                                  | STEAP4      | STEAP family member 4                                                     | -1.3        | 9.91E-06 | down vs. Tam                  | T47D      |
|                                                  | BAMBI       | BMP and activin membrane-bound inhibitor homolog                          | -1.58       | 1.26E-10 | down vs. Tam                  | T47D      |
|                                                  | HCG27       | HLA complex group 27                                                      | -1.25       | 4.11E-05 | down vs. Tam                  | MCF7      |
|                                                  | MRPL54      | mitochondrial ribosomal protein L54                                       | -1.28       | 6.64E-05 | down vs. Tam                  | MCF7      |
