# Supplementary material
Source: publisher figshare collection journal article supplement (https://tandf.figshare.com/articles/dataset/_/24160319)

# Supplemental 1

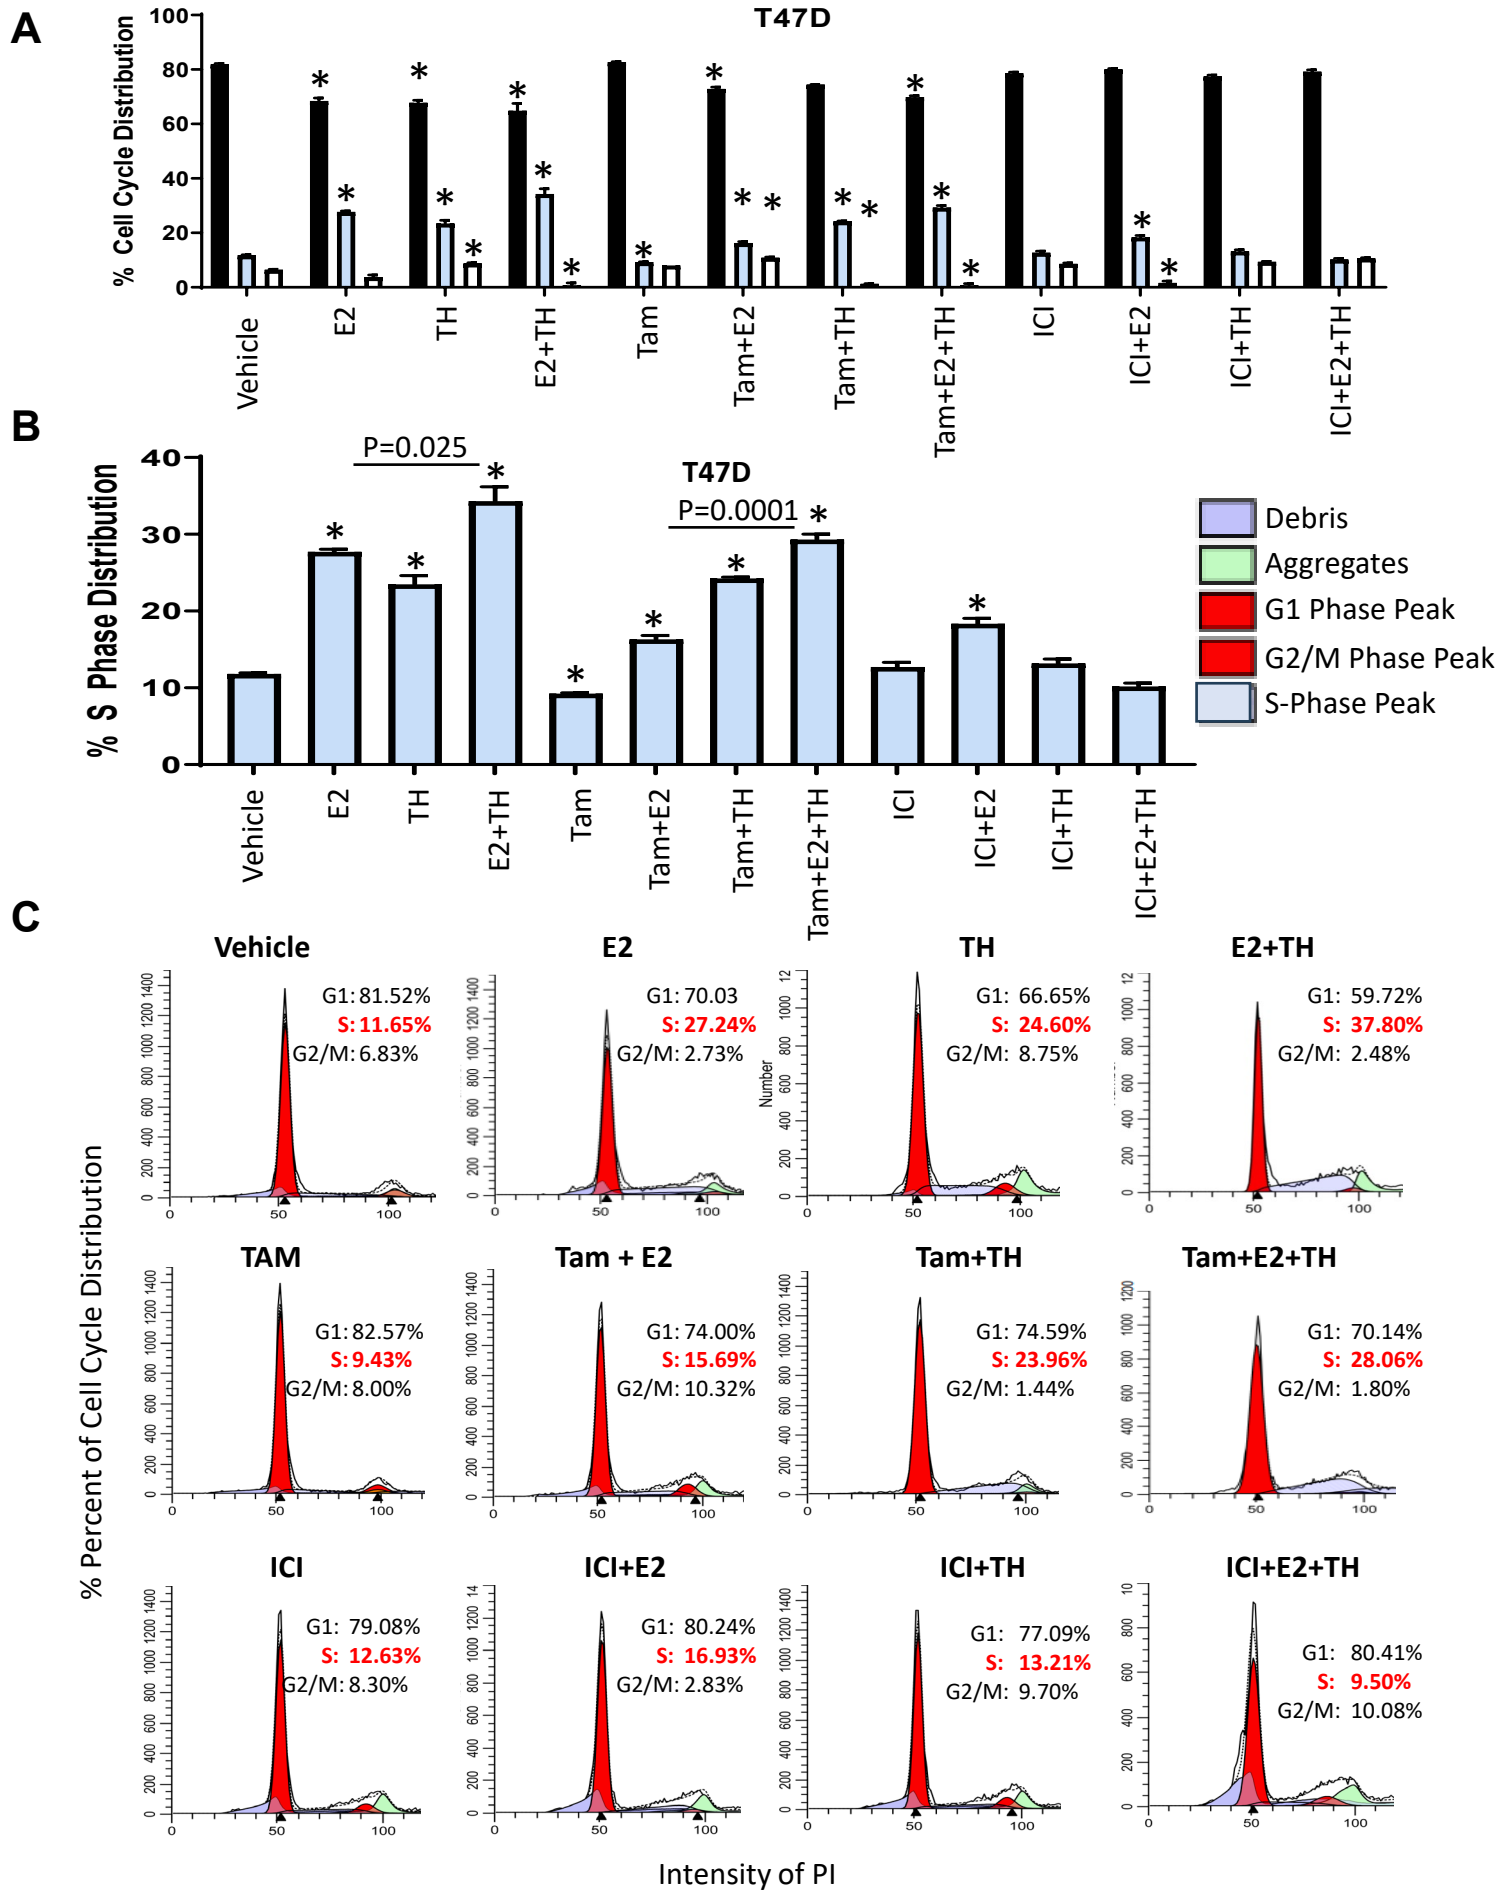

# Supplemental 2

**A**

T47D

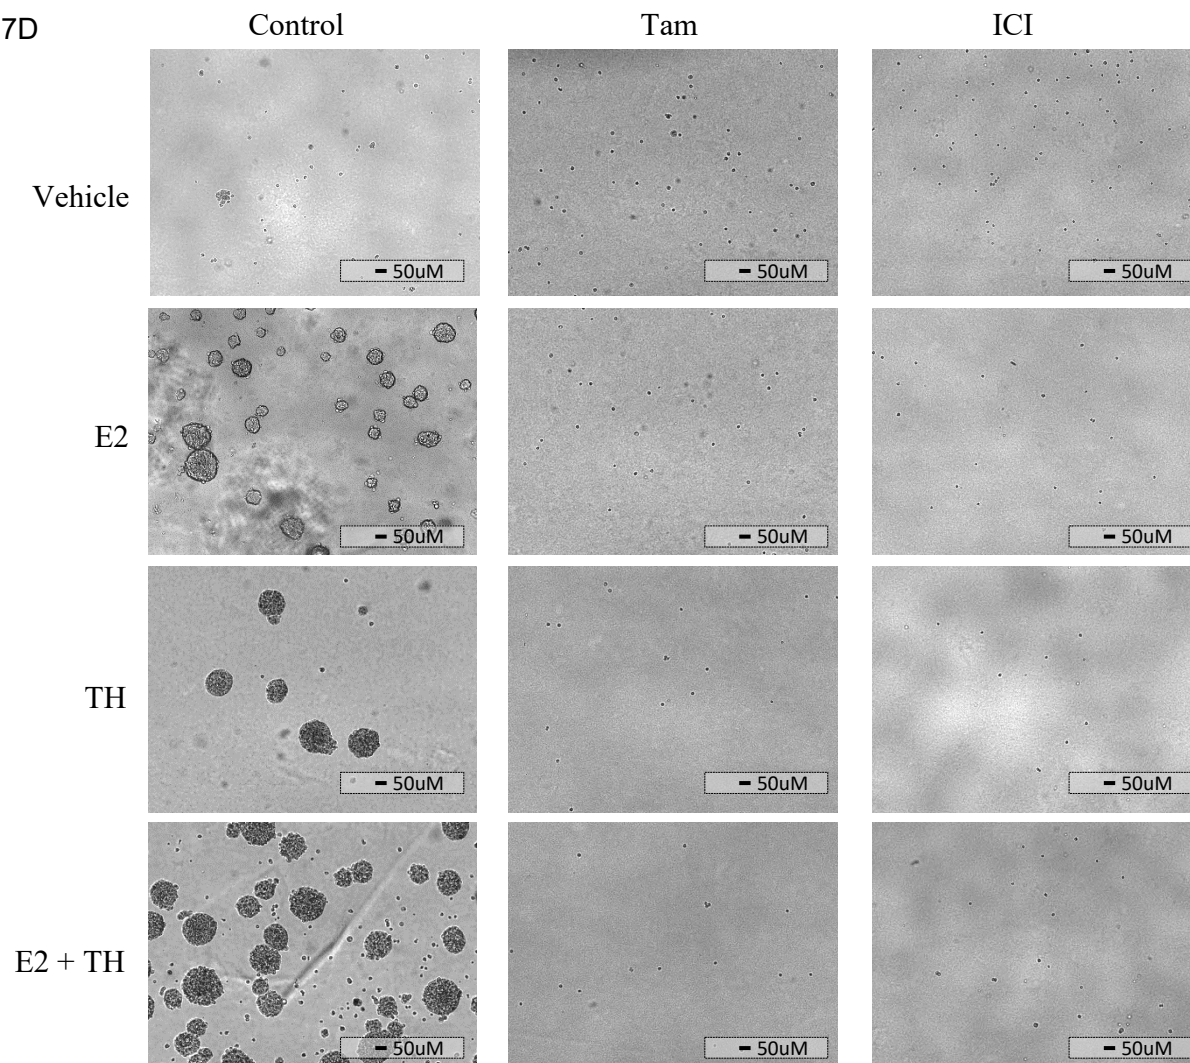

**B**

T47D

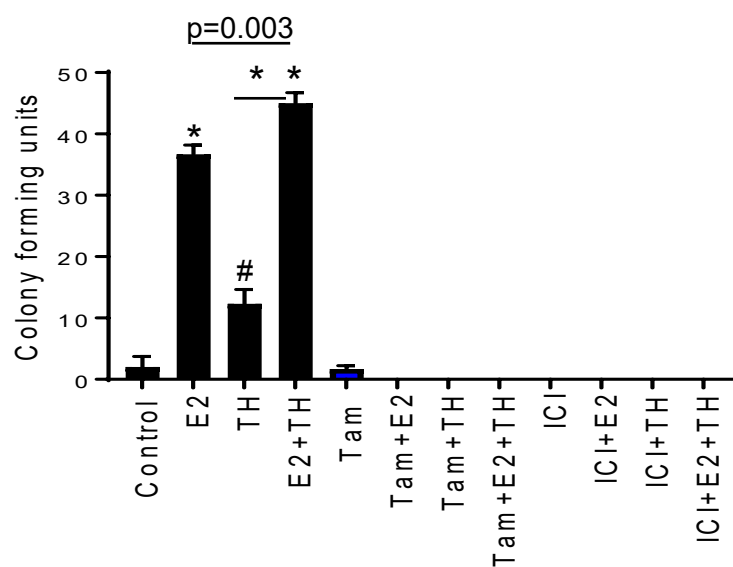

Supplemental 3

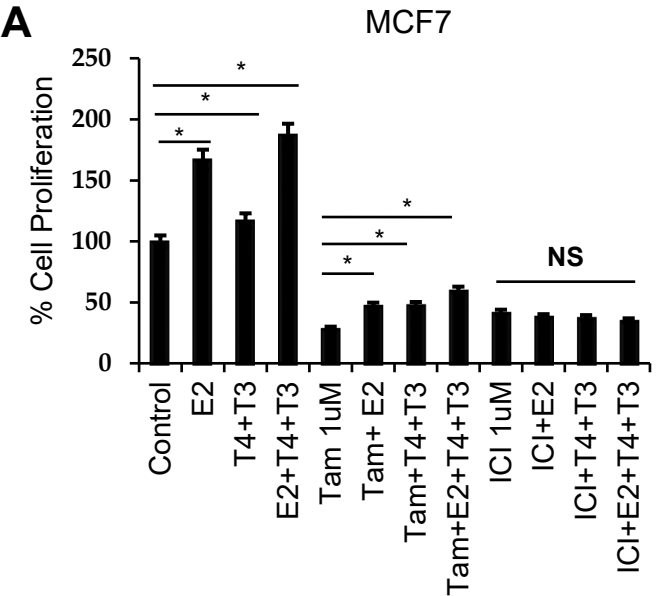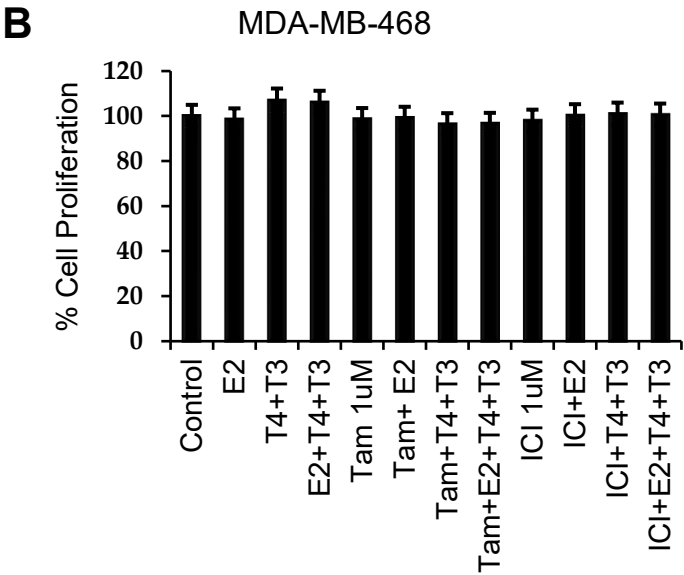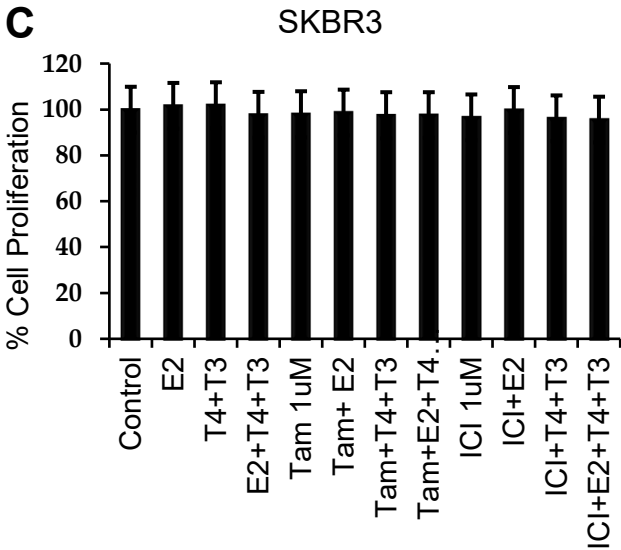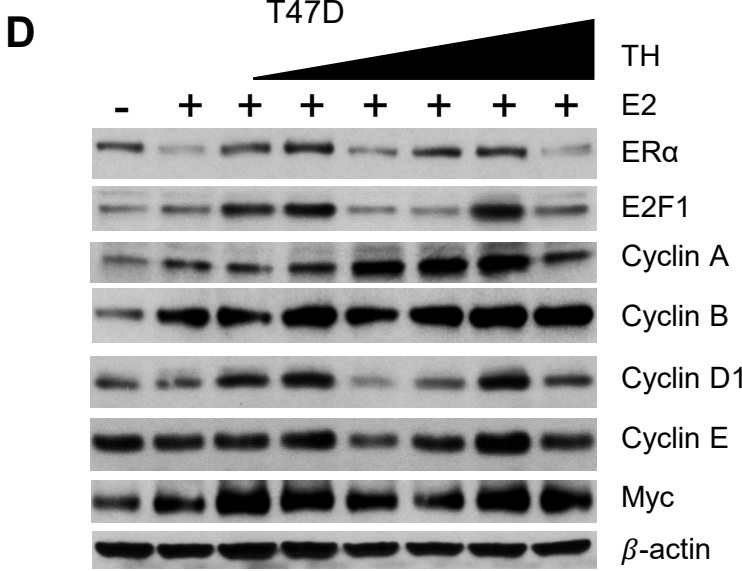

**F** MCF7

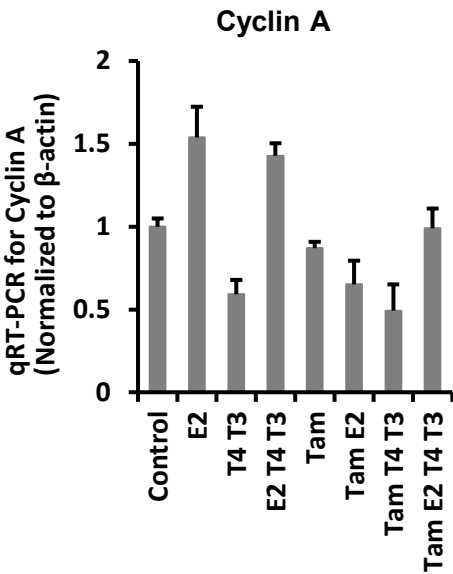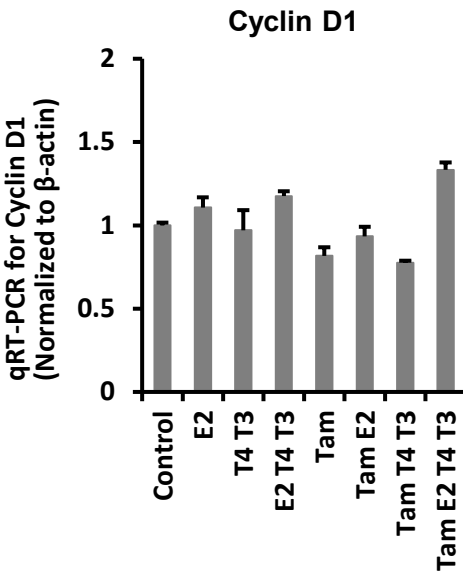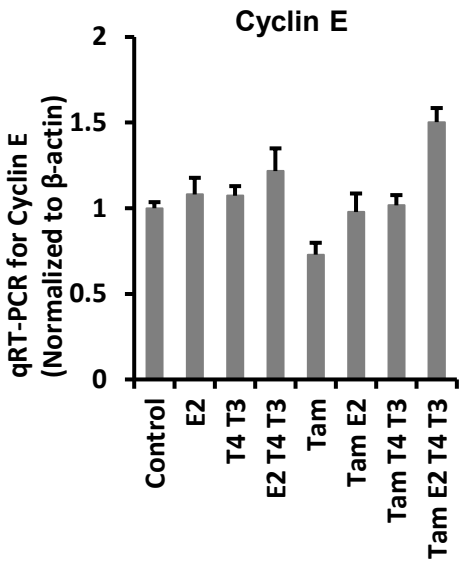

Supplement: Supplementary file 1 [file 1]

# Supplemental 1



# Supplemental 2

**A**

T47D



**B**

T47D



# Supplemental 3

**A**

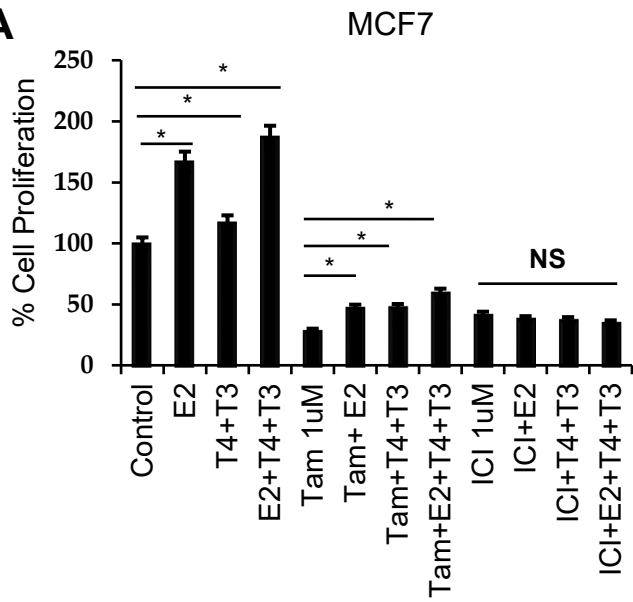

**B**

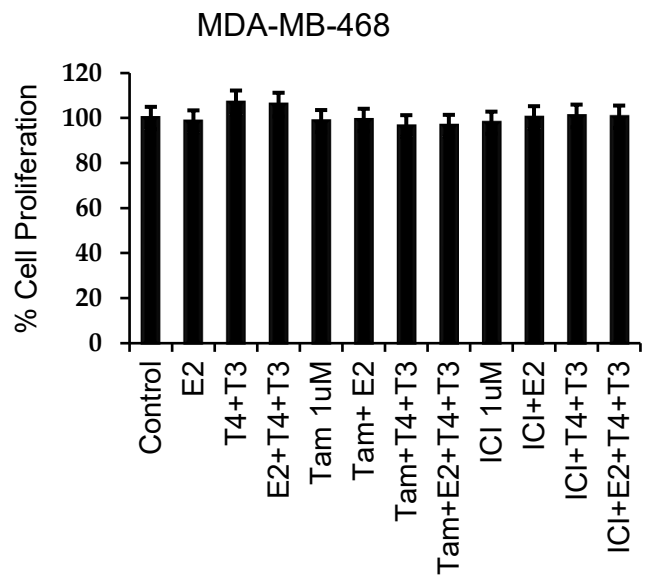

**C**

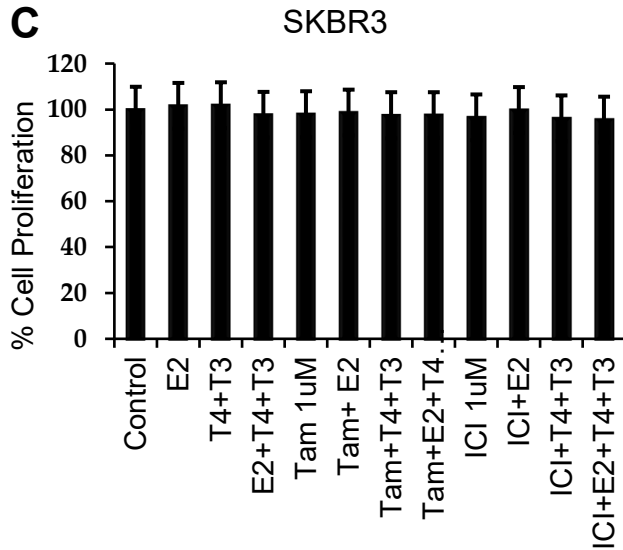

**D**

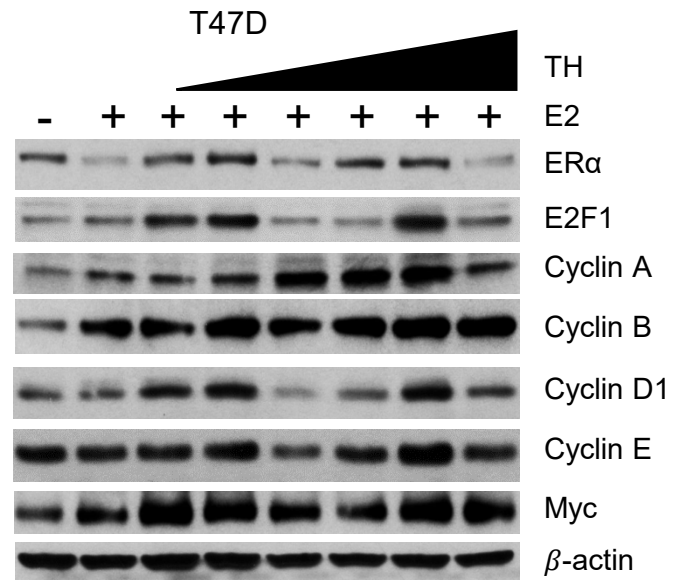

**F** MCF7

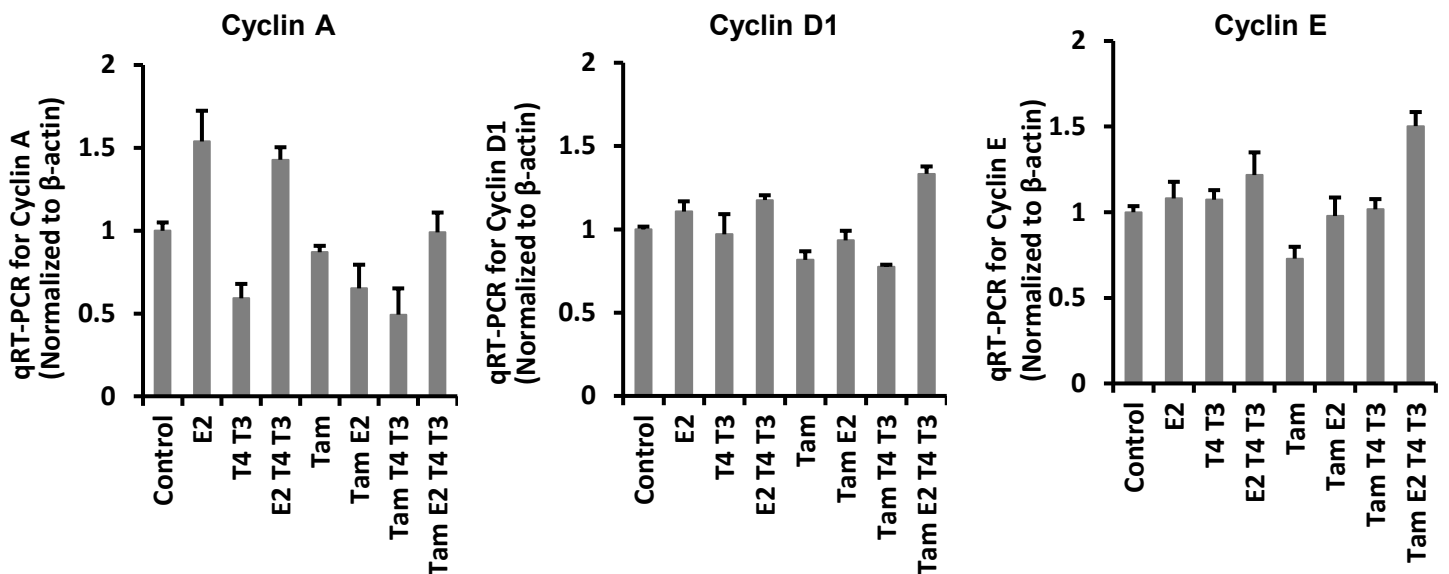

Supplement: Supplementary file 3 [file 1]
